# Supplementary material
Source: publisher figshare collection journal article supplement (https://karger.figshare.com/articles/dataset/_/5126209)
Supplement: Supplementary file 1 [file 1]

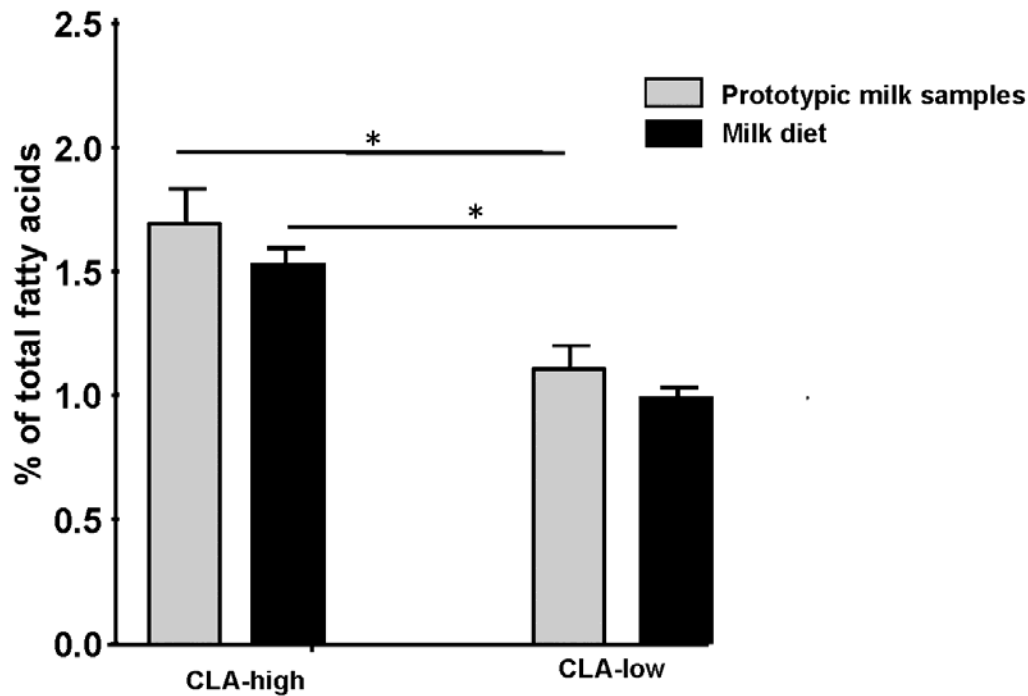

**Fig. S1. Comparison of CLA levels in milk batches with CLA high and low content and in the diets after pasteurization and spray drying.** CLA content in milk batches ( $n_{\text{samples}}=3$ , gray bars) and in both diets ( $n_{\text{samples}}=3$ , black bars) were determined by GC in and compared by a Student T-test.

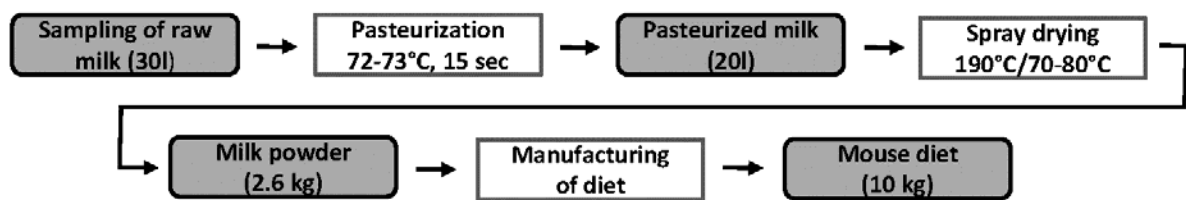

**Fig. S2. Flow chart of milk processing.** Raw milk batches (CLA-high and CLA-low) were pasteurized and spray-dried before integrated into a commercially available basic mouse diet from Altromin (C1000).
