# Supplementary material
Source: publisher figshare collection journal article supplement (https://karger.figshare.com/articles/dataset/_/5126209)
Supplement: Supplementary file 2 [file 1]

**Table S1.** Gradient and flow rates used for the separation of the phospholipids<sup>a</sup>

| time (min) | flow rate (μl/min) | solvent A (%) | solvent B (%) |
|------------|--------------------|---------------|---------------|
| 0          | 5                  | 100           | 0             |
| 5          | 5                  | 100           | 0             |
| 25         | 5                  | 0             | 100           |
| 30         | 5                  | 0             | 100           |
| 60         | 5                  | 0             | 100           |
| 61         | 5                  | 100           | 0             |
| 80         | 5                  | 100           | 0             |

<sup>a</sup>Solvents: A, chloroform/methanol/ ammonia solution 28-30% = 86/13/1; B, chloroform/methanol/ ammonia solution 28-30% = 50/49/1
